# Supplementary material for: A Ti3C2Tx MXene/alginic acid-derived mesoporous carbon nanocomposite as a potential electrode material for coin-cell asymmetric supercapacitors
Source: Royal Society of Chemistry journal article supplement (doi:10.1039/d4nr04584j), 2025-01-01
Supplement: d4nr04584j1.pdf [file d4nr04584j1.pdf]

## **Supporting Information**

### **Ti<sub>3</sub>C<sub>2</sub>T<sub>x</sub> MXene/Alginic Acid-Derived Mesoporous Carbon Nanocomposite as a Potential Electrode Material for Coin-Cell Asymmetric Supercapacitor**

Sanjay D. Sutar, and Anita Swami\*

Department of Chemistry, SRM Institute of Science and Technology, Kattankulathur -  
603 203, Chennai (India)

\*Corresponding author e-mail: swamians@srmist.edu.in

#### **Instrumental Characterization**

The Ti<sub>3</sub>C<sub>2</sub>T<sub>x</sub>/Mesoporous Carbon nanocomposites were characterized using various spectroscopic and microscopic techniques. Powder XRD patterns were recorded on an X'pert pro diffractometer, PANalytical using Cu K<sub>α</sub> radiation ( $\lambda = 1.5406 \text{ \AA}$ , 40 kV, 40 mA) in the 2 $\theta$  range of 5-90° with the scan rate of 2° min<sup>-1</sup>. Micro-Raman Spectrometer (LabRAM HR Evolution HORIBA France) was used for Raman analysis, using powder samples on a glass substrate. An oxixus laser of 633 nm wavelength (having max. power of 100 mW) was used throughout the complete measurement. The morphology of the prepared nanocomposites was investigated by using scanning electron microscopy (SEM) on a Quanta 200 FEG FE-SEM and transmission electron microscopy (TEM) on a JEOL-1010 transmission electron microscope operated at an acceleration voltage of 20 kV and 100 kV respectively. Whereas, high angle annular dark field-scanning transmission electron microscopy (HAADF-STEM) and elemental analysis mapping were conducted on an FEI make Tecnai TEM T-20 operating at 200 kV with LaB<sub>6</sub> filament fitted with Gatan Digital camera (bottom mount) with a resolution of 2K. The specific surface area of the sample was calculated by the Brunauer-Emmet-Teller (BET) method using a Quantachrome Nova-1000 surface analyzer. The pore size distribution was determined from the adsorption branches of isotherms through Barrett-Joyner-Halenda (BJH) method. Thermo Gravimetric Analysis (TGA) were done with a STA 2500 Regules instrument at a temperature range, RT-1100 °C in an inert atmosphere. X-ray photoelectron spectroscopy (XPS) measurements were done with a Thermo K-5 Alpha XPS instrument at a pressure better than  $1 \times 10^{-9}$  Torr with a pass energy of 50 eV, electron take-off angle of 60° and an overall resolution of ~1 eV using monochromatic Al K<sub>α</sub> (source,  $h\nu = 1486.6 \text{ eV}$ ). The spectra were fitted using a combined polynomial and Shirley-type background function.

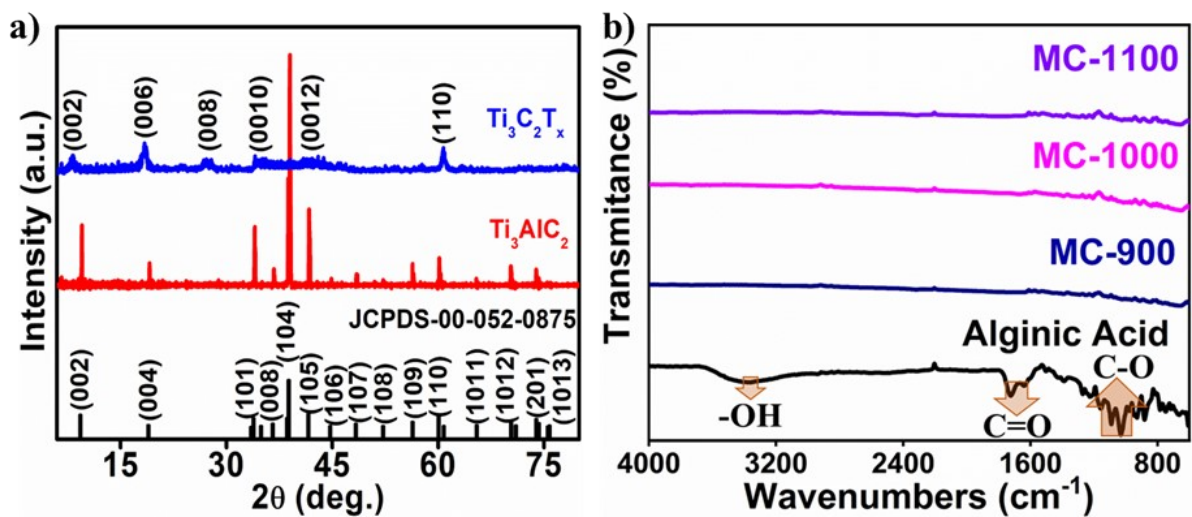

**Figure S1.** (a) XRD patterns of  $Ti_3AlC_2$  and  $Ti_3C_2T_x$ ; (b) FTIR spectra of the Alginic acid and MC-T.

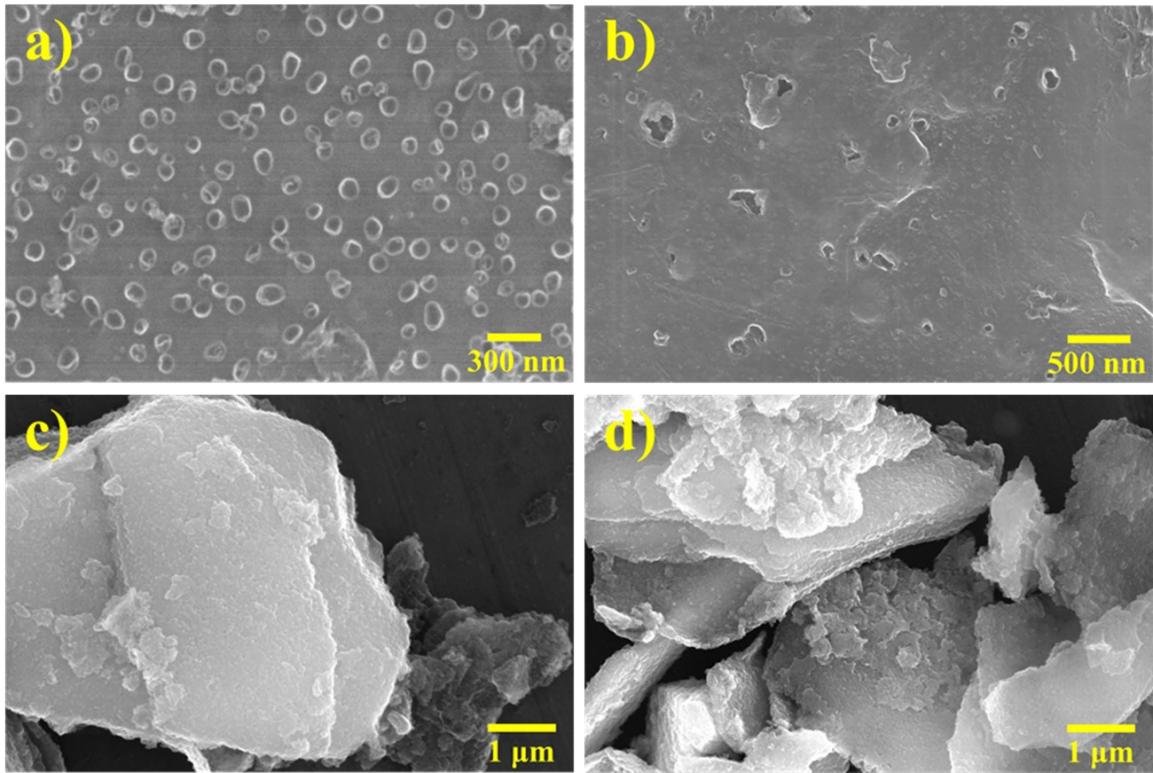

**Figure S2.** SEM images of (a) MC-900, (b) MC-1100, (c) Ti<sub>3</sub>C<sub>2</sub>T<sub>x</sub>/MC-5 and (d) Ti<sub>3</sub>C<sub>2</sub>T<sub>x</sub>/MC-1 nanocomposite.

**Table S1.** Titanium, Carbon, Oxygen and Fluorine content (wt% and at%) obtained from EDS analysis of all synthesized materials

| Materials                                           | Carbon |      | Oxygen |      | Titanium |      | Fluorine |      |
|-----------------------------------------------------|--------|------|--------|------|----------|------|----------|------|
|                                                     | Wt %   | At % | Wt %   | At % | Wt %     | At % | Wt %     | At % |
| Alginate Acid                                       | 47.6   | 54.7 | 52.4   | 45.3 |          |      |          |      |
| MC-900                                              | 83.7   | 84.1 | 16.3   | 15.9 |          |      |          |      |
| MC-1000                                             | 88.5   | 88.7 | 11.5   | 11.3 |          |      |          |      |
| MC-1100                                             | 87.8   | 86.5 | 13.2   | 13.5 |          |      |          |      |
| Ti <sub>3</sub> C <sub>2</sub> T <sub>x</sub>       | 15.8   | 16.0 | 2.9    | 4.0  | 66.6     | 63.0 | 14.7     | 17.0 |
| Ti <sub>3</sub> C <sub>2</sub> T <sub>x</sub> /MC-9 | 78.1   | 77.2 | 17.5   | 16.8 | 3.1      | 3.8  | 1.3      | 2.2  |
| Ti <sub>3</sub> C <sub>2</sub> T <sub>x</sub> /MC-5 | 43.6   | 46.1 | 19.6   | 19.4 | 30.1     | 29.2 | 6.7      | 5.3  |
| Ti <sub>3</sub> C <sub>2</sub> T <sub>x</sub> /MC-1 | 9.2    | 10.1 | 25.6   | 27.1 | 56.4     | 53.2 | 8.8      | 9.6  |

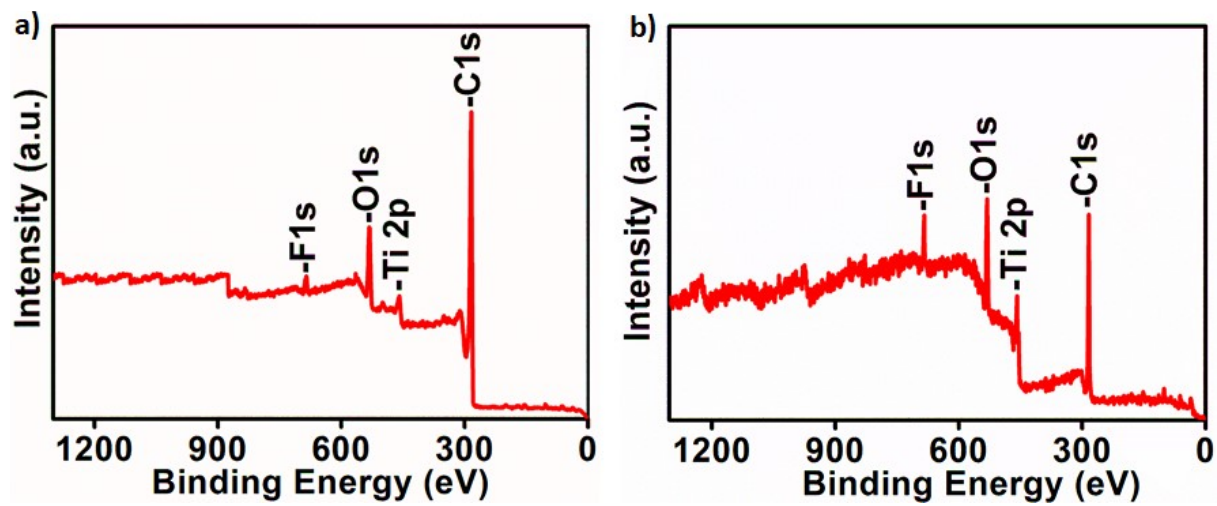

**Figure S3.** XPS survey spectra of  $\text{Ti}_3\text{C}_2\text{T}_x/\text{MC-9}$  and  $\text{Ti}_3\text{C}_2\text{T}_x$ .

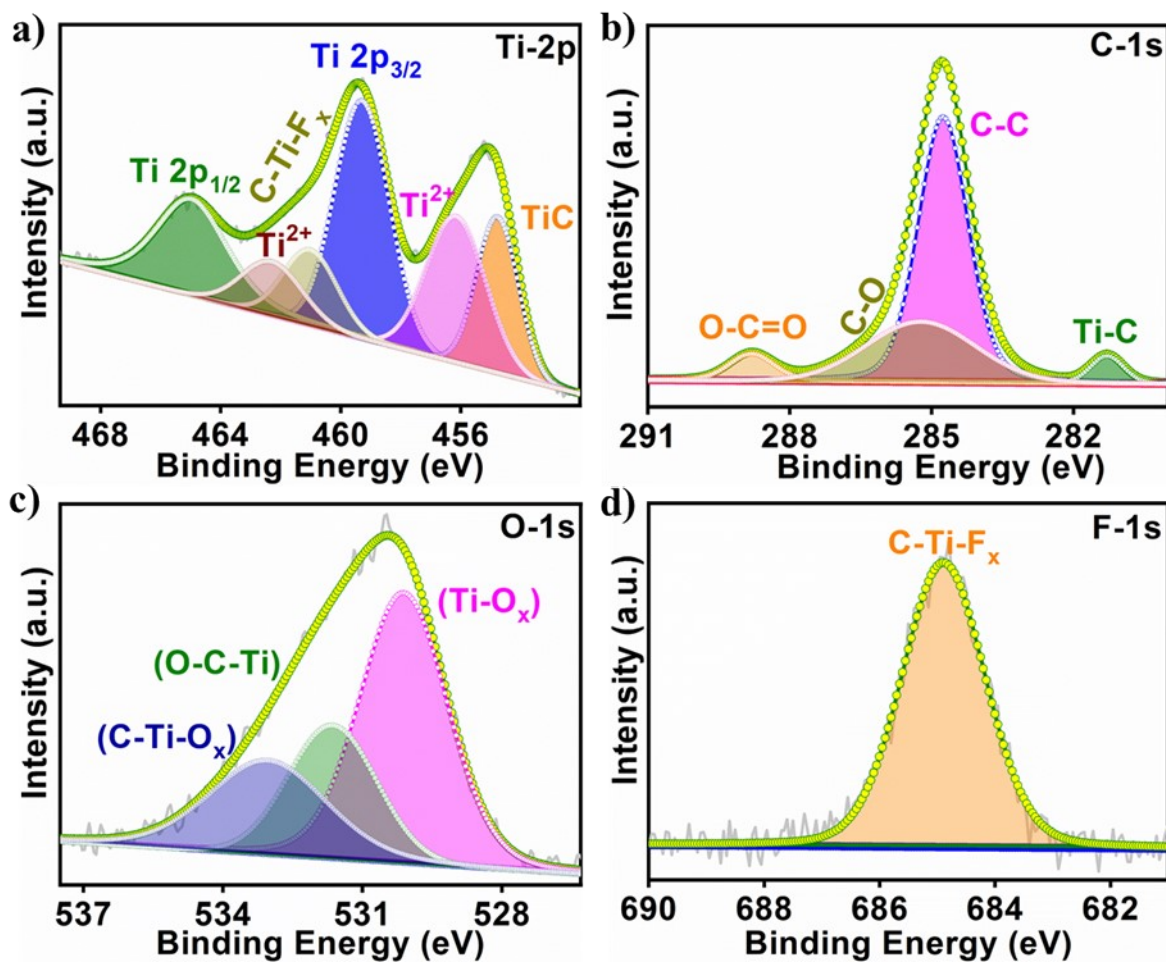

Figure S4. XP spectra (a) Ti 2p, (b) C 1s, (c) O 1s and (d) F 1s core levels of MXene ( $\text{Ti}_3\text{C}_2\text{T}_x$ ).

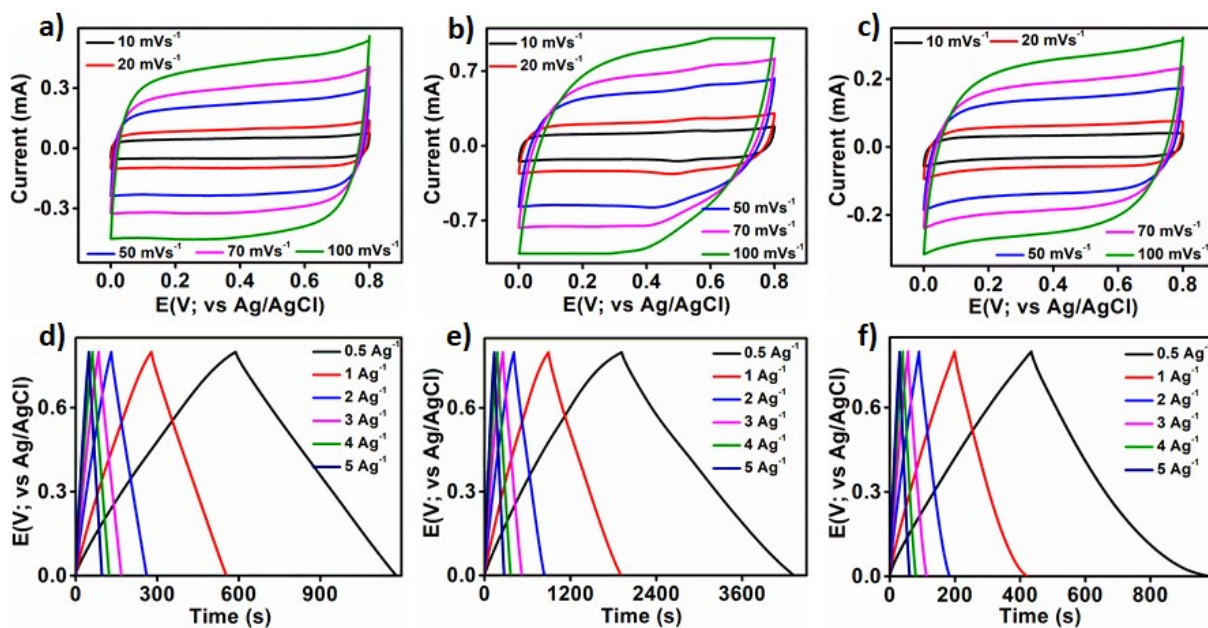

**Figure S5.** (a-c) CV and (d-f) GCD curves at various scan rates and current densities recorded for MC-900, MC-1000 and MC-1100 in 0.5 M H<sub>2</sub>SO<sub>4</sub> acidic electrolyte.



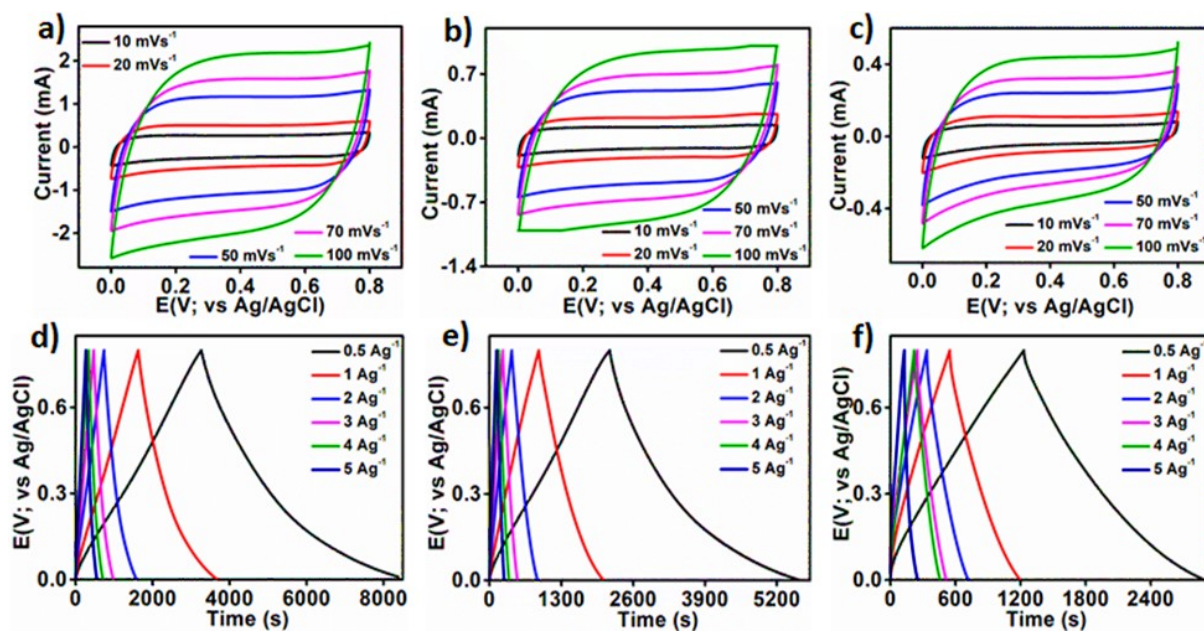

**Figure S6.** (a-c) CV and (d-e) GCD curves at various scan rates and current densities recorded for Ti<sub>3</sub>C<sub>2</sub>T<sub>x</sub>/MC-9, Ti<sub>3</sub>C<sub>2</sub>T<sub>x</sub>/MC-5 and Ti<sub>3</sub>C<sub>2</sub>T<sub>x</sub>/MC-1 in 0.5 M H<sub>2</sub>SO<sub>4</sub> acidic electrolyte.



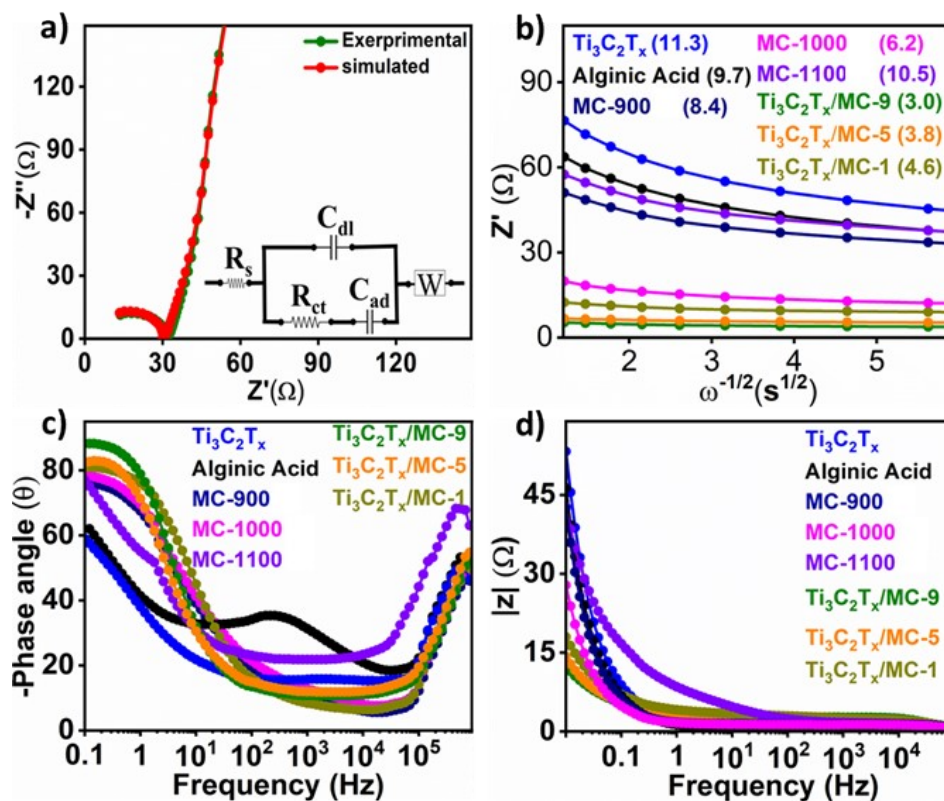

**Figure S7.** (a) Experimental and fitted EIS curves for  $\text{Ti}_3\text{C}_2\text{T}_x/\text{MC-9}$  electrode and the inset shows corresponding equivalent circuit diagram; (b) linear fit of  $Z'$  data against the square root of the period ( $\omega$ ) in the high-frequency region; Bode plot (c) -phase angle vs. frequency, (d)  $|z|$  vs. frequency.

**Table S2.** The transport properties of various electrodes obtained from simulated impedance spectra in Fig. (6e and 6f).

| <b>Materials</b>  | <b><math>R_s(\Omega)</math></b> | <b><math>R_{ct}(\Omega)</math></b> | <b><math>Z_w(m\ \Omega\ s^{-1/2})</math></b> | <b><math>C_{ad}(mF)</math></b> |
|-------------------|---------------------------------|------------------------------------|----------------------------------------------|--------------------------------|
| Alginic Acid      | 13.5                            | 52.0                               | 9.7                                          | 0.04                           |
| MC-900            | 13.5                            | 45.5                               | 8.4                                          | 0.03                           |
| MC-1000           | 12.8                            | 39.1                               | 6.2                                          | 0.6                            |
| MC-1100           | 13.4                            | 50.1                               | 10.5                                         | 0.9                            |
| $Ti_3C_2T_x$      | 15.4                            | 56.1                               | 11.3                                         | 0.06                           |
| $Ti_3C_2T_x/MC-9$ | 12.8                            | 31.6                               | 3.0                                          | 0.4                            |
| $Ti_3C_2T_x/MC-5$ | 12.8                            | 34.1                               | 3.8                                          | 0.6                            |
| $Ti_3C_2T_x/MC-1$ | 13.5                            | 35.6                               | 4.6                                          | 0.7                            |

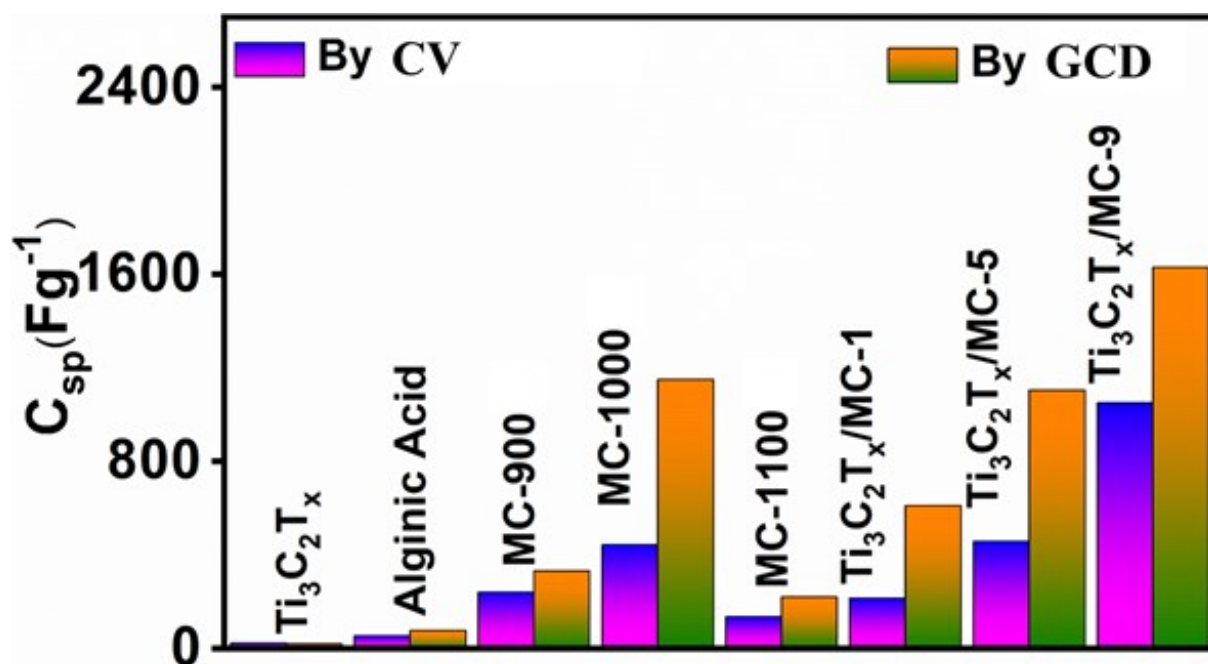

**Figure S8.** The specific capacitance for various synthesized nanocomposites from cyclic voltammetry (blue-pink bar) and galvanostatic charge-discharge (green-orange bar) at sweep rate and current density of 100 mV s<sup>-1</sup> and 1 A g<sup>-1</sup> respectively.

**Table S3** The calculated specific capacitance in half-cell configuration for various active electrode materials.

| Materials                                           | Specific Capacitance (F g <sup>-1</sup> )      |                                                    |
|-----------------------------------------------------|------------------------------------------------|----------------------------------------------------|
|                                                     | by CV<br>@ scan rate of 100 mV s <sup>-1</sup> | by GCD<br>@ current density of 1 A g <sup>-1</sup> |
| Alginic Acid                                        | 54                                             | 76                                                 |
| MC-900                                              | 240                                            | 331                                                |
| MC-1000                                             | 442                                            | 1149                                               |
| MC-1100                                             | 134                                            | 219                                                |
| Ti <sub>3</sub> C <sub>2</sub> T <sub>x</sub>       | 22                                             | 18                                                 |
| Ti <sub>3</sub> C <sub>2</sub> T <sub>x</sub> /MC-9 | 1049                                           | 1629                                               |
| Ti <sub>3</sub> C <sub>2</sub> T <sub>x</sub> /MC-5 | 457                                            | 1102                                               |
| Ti <sub>3</sub> C <sub>2</sub> T <sub>x</sub> /MC-1 | 214                                            | 610                                                |

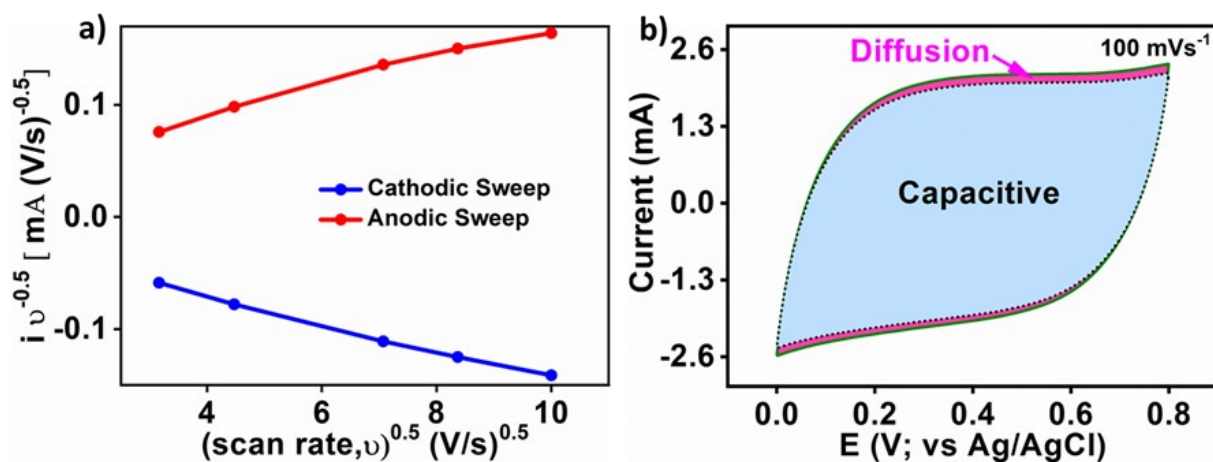

**Figure S9.** (a) The plot of  $i/(\text{scan rate}, v)^{0.5}$  against  $v^{0.5}$  for both anodic and cathodic voltammetric sweeps under an acidic medium to evaluate the value of  $k_1$  and  $k_2$  in equation 10 (from the main text); (b) CV curves at 100 mV s $^{-1}$ , showing the surface and diffusion-controlled charge storage contributions.

**Table S4.** The calculated specific capacitance of  $\text{Ti}_3\text{C}_2\text{T}_x/\text{MC-9}$  electrode material under the half-cell configuration.

| Cycles No.<br>(1K=1000) | Specific Capacitance ( $\text{F g}^{-1}$ )      |                                                     |
|-------------------------|-------------------------------------------------|-----------------------------------------------------|
|                         | by CV<br>@ scan rate of $100 \text{ mV s}^{-1}$ | by GCD<br>@ current density of $1 \text{ A g}^{-1}$ |
| 0k                      | 1049                                            | 1629                                                |
| 5k                      | 985                                             | 1484                                                |
| 10k                     | 1017                                            | 1633                                                |
| 15k                     | 1036                                            | 1627                                                |
| 20k                     | 953                                             | 1629                                                |
| 25k                     | 1051                                            | 1632                                                |
| 30k                     | 1036                                            | 1640                                                |
| 35k                     | 933                                             | 1627                                                |

**Table S5.** The calculated Specific Capacitance from CV and GCD curves of fabricated MC-1000//Ti<sub>3</sub>C<sub>2</sub>T<sub>x</sub>/MC-9 asymmetric supercapacitor device.

| <b>Cycles No.<br/>(1K=1000)</b> | <b>Specific capacitance (F g<sup>-1</sup>)</b>        |                                                           |
|---------------------------------|-------------------------------------------------------|-----------------------------------------------------------|
|                                 | <b>by CV</b><br>@ scan rate of 100 mV s <sup>-1</sup> | <b>by GCD</b><br>@ current density of 1 A g <sup>-1</sup> |
| 0k                              | 51.7                                                  | 80.3                                                      |
| 10k                             | 47.8                                                  | 71.4                                                      |
| 20k                             | 47.5                                                  | 71.5                                                      |
| 30k                             | 48.6                                                  | 76.1                                                      |
| 40k                             | 48.5                                                  | 76.3                                                      |
| 50k                             | 50.1                                                  | 80.3                                                      |
| 60k                             | 50.5                                                  | 78.3                                                      |

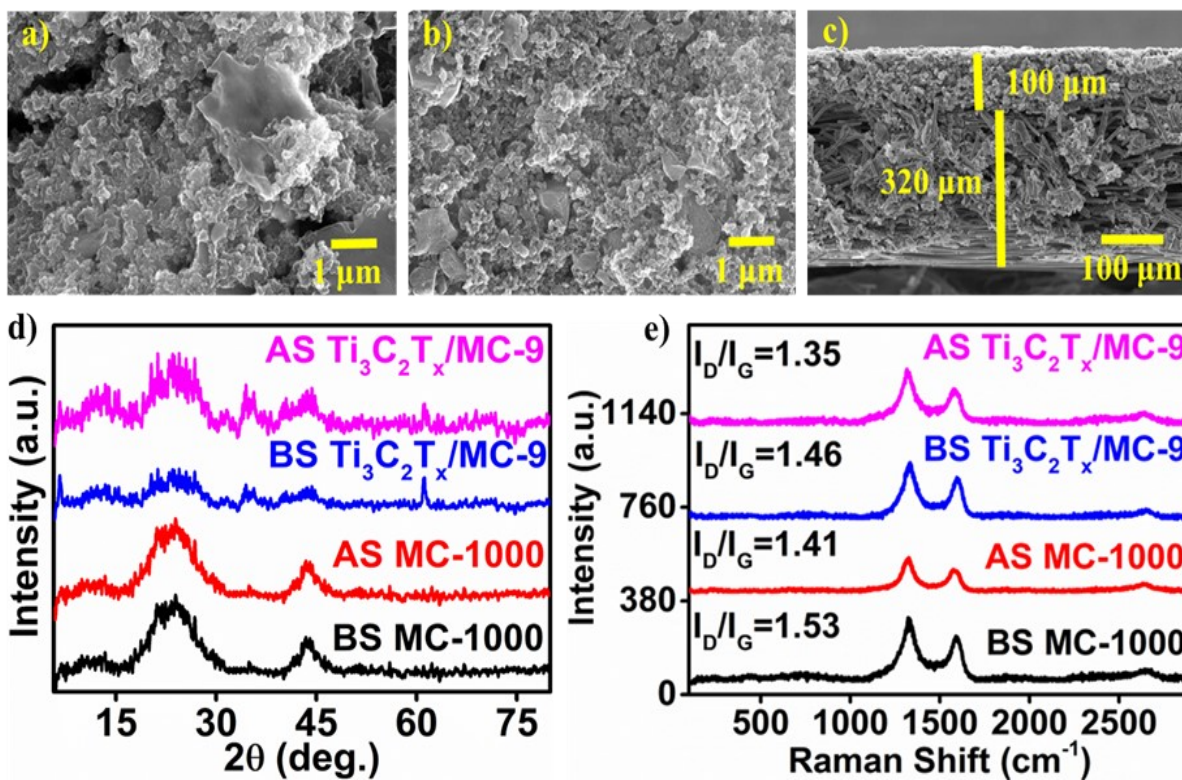

**Figure S10.** Post stability study of the Coin-Cell ASC; SEM images of (a-b) MC-1000, before and after stability, respectively; (c) SEM image displaying cross section of the Ti<sub>3</sub>C<sub>2</sub>T<sub>x</sub>/MC-9 electrode material deposited on carbon paper showing its thickness; (d) XRD patterns and (e) Raman spectra of Ti<sub>3</sub>C<sub>2</sub>T<sub>x</sub>/MC-9 and MC-1000, before and after stability study.



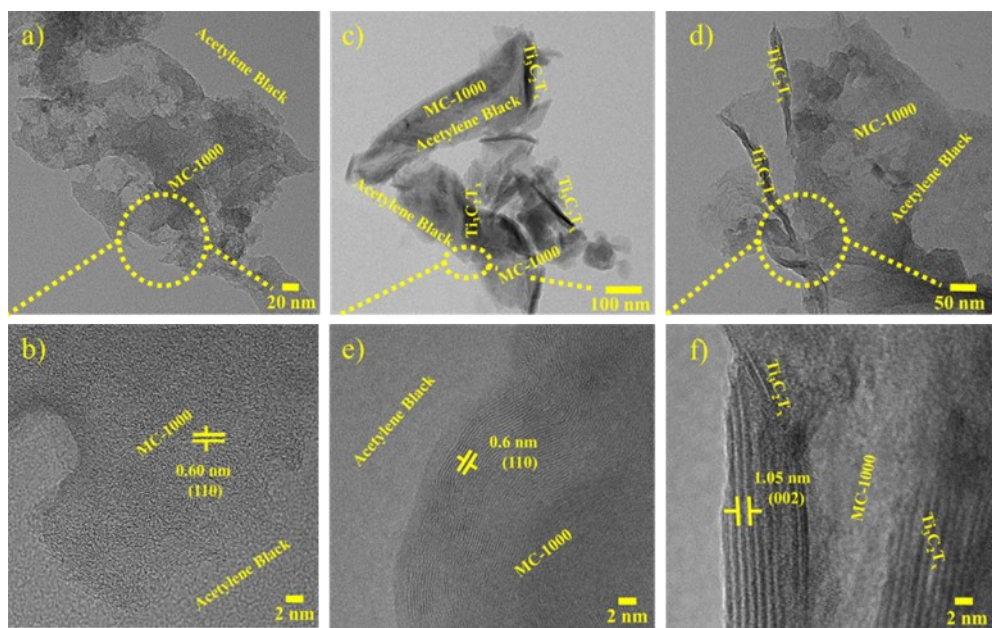

**Figure S11.** Post stability study: TEM and HRTEM images of (a-b) MC-1000 and (c-f)  $\text{Ti}_3\text{C}_2\text{T}_x/\text{MC-9}$  nanocomposite.

**Table S6.** The comparative electrochemical performance for the MXene ( $\text{Ti}_3\text{C}_2\text{T}_x$ ) and carbon based electrode materials.

| Materials                                                                              | Preparation Method                        | Electrolyte                    | Specific Capacitance                             |                                       | Cycling Stability <sup>(a)</sup>                | Cycling Stability <sup>(b)</sup>          | Ref. |
|----------------------------------------------------------------------------------------|-------------------------------------------|--------------------------------|--------------------------------------------------|---------------------------------------|-------------------------------------------------|-------------------------------------------|------|
|                                                                                        |                                           |                                | Electrode (a)                                    | Device (b)                            |                                                 |                                           |      |
| CPCM/MXene                                                                             | annealing treatment at 800°C              | 1mol/L $\text{H}_2\text{SO}_4$ | 362 F g <sup>-1</sup> ,<br>0.5 A g <sup>-1</sup> | --                                    | 93.87 %<br>@10,000                              | --                                        | 1    |
| CP@rGO//MXene                                                                          | oxidative polymerization                  | 3 M $\text{H}_2\text{SO}_4$    | 280 F g <sup>-1</sup> ,<br>0.5 A g <sup>-1</sup> | 57, 59, and<br>47 F g <sup>-1</sup> , | --                                              | 88 % @20000<br>75 % @20000<br>80 % @10000 | 2    |
| MXene/N-doped carbon foam                                                              | annealing treatment at 800°C              | 1M KOH                         | 332 F g <sup>-1</sup>                            | 63 F g <sup>-1</sup>                  | 99.2 %<br>@10,000                               | 96 %<br>@2500                             | 3    |
| $\text{Ti}_3\text{C}_2\text{T}_x$ -MCNT                                                | polymerization                            | 0.5M $\text{Na}_2\text{SO}_4$  | 1.93 F cm <sup>-2</sup>                          | 0.94 F cm <sup>-2</sup>               | 94 %<br>@1000                                   | 72 %<br>@1000                             | 4    |
| MXene-RuO <sub>2</sub>                                                                 | hydrothermal                              | 1M $\text{H}_2\text{SO}_4$     | 388 F g <sup>-1</sup>                            | 93 F g <sup>-1</sup>                  | 88 %<br>@20000                                  | 86 %<br>@20000                            | 5    |
| $\text{Ti}_3\text{C}_2\text{T}_x$ nanosheet / $\text{Ti}_3\text{C}_2\text{T}_x$ QD/RGO | wet-spinning technique,                   | 1m $\text{H}_2\text{SO}_4$     | 542 F cm <sup>-3</sup>                           | 53.1 F cm <sup>-3</sup>               | 95.6 %<br>@5,000                                | 96.6 %<br>@5000                           | 6    |
| $\text{Ti}_3\text{C}_2\text{T}_x$ /RGO                                                 | hydrothermal                              | 2M KOH                         | 154.3 F g <sup>-1</sup>                          | --                                    | 85 %<br>@ 6,000                                 | --                                        | 7    |
| $\text{Ti}_3\text{C}_2\text{T}_x$ /RGO                                                 | vacuum-assisted filtration                | 1M $\text{H}_2\text{SO}_4$     | 140 F g <sup>-1</sup>                            | 29 F g <sup>-1</sup>                  | 85 %<br>@10,000                                 | 85 %<br>@10,000                           | 8    |
| rGO: $\text{Ti}_3\text{C}_2\text{T}_x$                                                 | self-assembly<br>20000 rpm                | 1M $\text{H}_2\text{SO}_4$     | 254 F g <sup>-1</sup><br>2 mV s <sup>-1</sup>    | --                                    | 193 F g <sup>-1</sup><br>@100 mVs <sup>-1</sup> | ---                                       | 9    |
| MXene-rGO hydrogel                                                                     | electrostatic self-assembly               | 3M $\text{H}_2\text{SO}_4$     | 320 F g <sup>-1</sup>                            | --                                    | 46 %<br>@8000                                   | --                                        | 10   |
| $\text{Ti}_3\text{C}_2\text{T}_x$ -RGO                                                 | film through vacuum filtration            | 3M $\text{H}_2\text{SO}_4$     | 505 F g <sup>-1</sup>                            | --                                    | 50 %<br>@10,000                                 | --                                        | 11   |
| $\text{Ti}_3\text{C}_2\text{T}_x$ /SCNT                                                | Self-assembled composite film.            | 1M KOH                         | 314 F cm <sup>-3</sup>                           | --                                    | 95 %<br>@10000                                  | --                                        | 12   |
| rGO/ $\text{Ti}_3\text{C}_2\text{T}_x$                                                 | ultrasonic treatment<br>calcined at 300°C | 6M KOH                         | 405 F g <sup>-1</sup>                            | 148.5 F g <sup>-1</sup>               | 99.9 %<br>@10,000                               | 100 %<br>@10,000                          | 13   |

|                                                      |                                                    |                                              |                                                        |                                                        |                           |                           |                      |
|------------------------------------------------------|----------------------------------------------------|----------------------------------------------|--------------------------------------------------------|--------------------------------------------------------|---------------------------|---------------------------|----------------------|
| MXene/RGO                                            | Ultrasonication<br>After about 3 days,             | 1M<br>H <sub>2</sub> SO <sub>4</sub>         | 233 F g <sup>-1</sup>                                  | --                                                     | 91 %<br>@ 10,000          | --                        | 14                   |
| Ti <sub>3</sub> C <sub>2</sub> /CNTs                 | EPD                                                | 6M<br>KOH                                    | 134 F g <sup>-1</sup>                                  | 55.3 F g <sup>-1</sup>                                 | @10000                    | --                        | 15                   |
| 3D porous<br>MXene/rGO                               | 300°C electric<br>heating plates in a<br>glove box | 3M<br>H <sub>2</sub> SO <sub>4</sub>         | 340.8 F g <sup>-1</sup>                                | --                                                     | 90.7 %<br>@ 40,000        | --                        | 16                   |
| 3D macroscopic<br>graphene/MXene<br>hydrogel         | hydrothermal                                       | 6M<br>KOH                                    | 267.7 F g <sup>-1</sup>                                | --                                                     | 100 %<br>@10000           | --                        | 17                   |
| <b>Ti<sub>3</sub>C<sub>2</sub>T<sub>x</sub>/MC-9</b> | <b>Solvothermal</b>                                | <b>0.5 M<br/>H<sub>2</sub>SO<sub>4</sub></b> | <b>1629 F g<sup>-1</sup><br/>at 1 A g<sup>-1</sup></b> | <b>80.3 F g<sup>-1</sup><br/>at 1 A g<sup>-1</sup></b> | <b>99.9 %<br/>@35,000</b> | <b>97.5 %<br/>@60,000</b> | <b>This<br/>Work</b> |

- ❖ CP = conducting Polymer
- ❖ CPCM = chitosan porous carbon Spheres
- ❖ Pin = Polyindole

## References

- 1 L. Wei, W. Deng, S. Li, Z. Wu, J. Cai and J. Luo, *J. Bioresour. Bioprod.*, 2022, **7**, 63–72.
- 2 M. Boota and Y. Gogotsi, *Adv. Energy Mater.*, 2019, **9**, 1–8.
- 3 L. Sun, G. Song, Y. Sun, Q. Fu and C. Pan, *ACS Appl. Mater. Interfaces*, 2020, **12**, 44777–44788.
- 4 W. Liang and I. Zhitomirsky, *J. Mater. Chem. A*, 2021, **9**, 10335–10344.
- 5 C. Zhao, Q. Wang, H. Zhang, S. Passerini and X. Qian, *ACS Appl. Mater. Interfaces*, 2016, **8**, 15661–15667.
- 6 Y. Zhou, K. Maleski, B. Anasori, J. O. Thostenson, Y. Pang, Y. Feng, K. Zeng, C. B. Parker, S. Zauscher, Y. Gogotsi, J. T. Glass and C. Cao, *ACS Nano*, 2020, **14**, 3576–3586.
- 7 X. Zhou, Y. Qin, X. He, Q. Li, J. Sun, Z. Lei and Z.-H. Liu, *ACS Appl. Mater. Interfaces*, 2020, **12**, 11833–11842.

- 8 A. M. Navarro-Suárez, K. Maleski, T. Makaryan, J. Yan, B. Anasori and Y. Gogotsi, *Batter. Supercaps*, 2018, **1**, 33–38.
- 9 Q. Jiang, N. Kurra, M. Alhabeab, Y. Gogotsi and H. N. Alshareef, *Adv. Energy Mater.*, 2018, **8**, 1–10.
- 10 P. Dutta, A. Sikdar, A. Majumdar, M. Borah, N. Padma, S. Ghosh and U. N. Maiti, *Carbon N. Y.*, 2020, **169**, 225–234.
- 11 Q. Fu, X. Wang, N. Zhang, J. Wen, L. Li, H. Gao and X. Zhang, *J. Colloid Interface Sci.*, 2018, **511**, 128–134.
- 12 Y. Fang, B. Yang, D. He, H. Li, K. Zhu, L. Wu, K. Ye, K. Cheng, J. Yan, G. Wang and D. Cao, *Chinese Chem. Lett.*, 2020, **31**, 1004–1008.
- 13 L. Shao, J. Xu, J. Ma, B. Zhai, Y. Li, R. Xu, Z. Ma, G. Zhang, C. Wang and J. Qiu, *Compos. Commun.*, 2020, **19**, 108–113.
- 14 S. Xu, G. Wei, J. Li, W. Han and Y. Gogotsi, *J. Mater. Chem. A*, 2017, **5**, 17442–17451.
- 15 L. Yang, W. Zheng, P. Zhang, J. Chen, W. B. Tian, Y. M. Zhang and Z. M. Sun, *J. Electroanal. Chem.*, 2018, **830–831**, 1–6.
- 16 J. Miao, Q. Zhu, K. Li, P. Zhang, Q. Zhao and B. Xu, *J. Energy Chem.*, 2021, **52**, 243–250.
- 17 L. Zhang, S. W. Or, *APL Mater.* 2020, **8**, 091101.
